# Supplementary material
Source: PubMed Central journal article supplement (PMC7530823)
Supplement: jamaophthalmol-e203820-s001.pdf [file jamaophthalmol-e203820-s001.pdf]

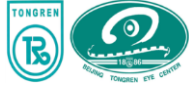

1  
2  
3  
4  
5  
6  
7  
8  
9  
10  
11  
12  
13  
14  
15  
16  
17  
18  
19  
20  
21  
22

**Atropine 0.01% eye drops to control  
myopia progression in Chinese  
children: a randomized,  
double-masked, placebo-controlled  
clinical trial**

**Trial Protocol**

23 **Research Question:**

- 24 1. Does atropine 0.01% eye drops prevent myopia progression and axial elongation  
25 when compared with the placebo group in Chinese myopic children?
- 26 2. Do the adverse effects of atropine 0.01% eye drops support its use in children  
27 with myopia?

28 **Rationale:**

29 Myopia has become a critical public health problem among both children and adults,  
30 especially in some East and Southeast Asian countries such as China and Singapore.<sup>1,2</sup>  
31 Recent review predicted that approximately half of the world's population will have  
32 myopia by 2050 and with 10% being high myopia.<sup>3</sup> In China, the prevalence of  
33 myopia reaches nearly 70% in grade 7 students, and exceeds 80% in university  
34 students.<sup>4,5</sup> Myopia not only is the most common causes of avoidable visual  
35 impairment and blindness, but high or pathologic myopia is associated with increased  
36 risk of irreversible blinding conditions, including myopic retinopathy, retinal  
37 detachment, choroidal neovascularization, and glaucoma,<sup>6-9</sup> leading to a heavy cost  
38 burden on individuals and communities.<sup>10,11</sup>

39 Atropine is a nonspecific muscarinic receptor antagonist. The exact mechanism of  
40 topical atropine in slowing myopia progression is still not clearly understood so far.  
41 The receptors was initially thought to be in the ciliary muscle by inhibiting the  
42 excessive accommodation, but atropine is effective in preventing myopia in animals,  
43 in which ciliary muscle is mediated by nicotinic receptor rather than muscarinic  
44 receptors.<sup>12-14</sup> However, atropine might have biochemical effects based on the retinal  
45 site of action, and muscarinic antagonist control of myopia is mediated via M1 and  
46 M4 muscarinic receptors.<sup>15</sup> Moreover, an inhibition of atropine on the synthesis of  
47 glycosaminoglycan in scleral chondrocytes may also exert anti-myopia effects.<sup>16,17</sup> At  
48 present, topical atropine has been demonstrated to have the strongest clinical effect on  
49 slowing the progression of myopia.<sup>18-20</sup> In 2006, the Atropine for the Treatment of  
50 Myopia 1 (ATOM 1) study founded that the mean rate of myopia progression after 2  
51 years was only  $-0.28 \pm 0.92$  D in the atropine 1% group compared with  $-1.20 \pm 0.69$  D in

52 the placebo group.<sup>19</sup> However, ocular side effects induced by 1% atropine such as  
53 blurred near vision, photophobia cycloplegia and allergy have limited its use.  
54 Furthermore, there was a greater myopic rebound in eyes that had received 0.5% and  
55 0.1% atropine when atropine was stopped (ATOM 2 study), whereas those receiving a  
56 low-dose 0.01% concentration proved sustained and minimal change.<sup>21</sup> Therefore,  
57 low concentration of 0.01% atropine is increasingly applied to clinical treatment for  
58 myopic children in Asia.

59 At present, the majority of the studies have been performed to evaluate the efficacy  
60 and safety of low concentration of 0.01% atropine through retrospective studies,<sup>22-24</sup>  
61 but few data are available from randomized controlled trials, with the exception of  
62 one in Singapore (ATOM 2 study).<sup>20</sup> In the ATOM 2 study in Singapore, Chia et al.  
63 reported the mean myopic progression over 2 years in the 355 children was  
64  $-0.30\pm 0.60$  D,  $-0.38\pm 0.63$  D, and  $-0.49\pm 0.63$  D in the atropine 0.5%, 0.1%, and 0.01%  
65 groups, respectively.<sup>20</sup> However, the lack of a placebo control group was an  
66 acknowledged weakness of the study. Thus, the effect of low concentration of 0.01%  
67 atropine has not been extensively evaluated through placebo-controlled trial at  
68 present.

69 Through randomized controlled trial, it can explore the efficacy of 0.01%  
70 low-concentration atropine eye drops in retarding the progression of myopia in  
71 school-aged children in China, as well as the side effects and adverse reactions, which  
72 help answer the above questions.

### 73 **Objective:**

- 74 1. To explore the effect of 0.01% low-concentration atropine eye drops on the  
75 myopia progression and axial elongation in low and moderate myopic Chinese  
76 children;
- 77 2. To explore the side effects and adverse effects of 0.01% low-concentration  
78 atropine eye drops in low and moderate myopic Chinese children;
- 79 3. To explore the myopic rebound when 0.01% low-concentration atropine eye  
80 drops was stopped;

81 4. To explore the optimal age for 0.01% low-concentration atropine eye drops use;

82 **Hypothesis:**

83 0.01% atropine eyed rops can significantly slow the myopia progression and axial  
84 elongation in children.

85 **Study Plan**

86 **Design:**

87 The design is a randomized, double-masked, placebo-controlled trial aimed to  
88 investigate the efficacy and safety of low concentrations of 0.01% atropine in low and  
89 moderate myopic children from April 2018 to July 2020. Two phases will include in  
90 this study. All children will be recruited and randomized to receive either 0.01%  
91 atropine or placebo eye drops in both eyes once daily at an allocation ratio of 1:1 for  
92 one year in Phase 1. At the beginning of the second year, the 0.01% atropine group  
93 will be crossed over to the placebo group and the placebo group will be crossed over  
94 to the 0.01% atropine group for one year in Phase 2.

95 **Inclusion and Exclusion Criteria:**

96 The myopic children will be recruited from Beijing Tongren Hospital, Beijing, China,  
97 between April 2018 and July 2018. All subjects met the following inclusion criteria:

- 98 1. Children aged 6 to 12 years with refractive error of spherical equivalent (SE)  
99 range of -1.00 D to -6.00 D in both eyes;
- 100 2. Astigmatism of -1.50 D or less in both eyes;
- 101 3. Best-corrected distance visual acuity 0.20 logMAR or better in both eyes;
- 102 4. Intraocular pressure (IOP) of less than 21 mm Hg.

103 Exclusion criteria were as follows:

- 104 1. Children with other combined ocular diseases (e.g., amblyopia, strabismus,  
105 corneal scar, cataract, glaucoma, or ocular tumor);
- 106 2. Previous or current treatment with atropine, pirenzepine, contact lenses, bifocals,  
107 or progressive addition lenses for myopia, allergy to atropine, cyclopentolate, or  
108 excipients.

**109 Procedures:**

110 All children who meet the inclusion and exclusion criteria will be referred to the clinic  
111 study coordinator who will seek fully informed patient consent prior to enrolling the  
112 patient. Those enrolled will be participated in this study underwent the same,  
113 standardized examination procedure at the baseline visit and 6 and 12 months after  
114 initiation of visit. Cycloplegic refraction was measured by an autorefractor (HRK7000  
115 A; Huvitz, Gunpo, South Korea) with three times consecutively with average data  
116 used for analysis. All 3 readings should be at most 0.25 D apart in both the spherical  
117 and cylinder components. During the examination of each subject, 3 drops of 1%  
118 cyclopentolate (Alcon) were administered at a 5-minute interval. Thirty minutes after  
119 the last drop, if pupillary light reflex was still present or the pupil size was less than  
120 6.0 mm, a fourth drop of 1% cyclopentolate was administered and the examination  
121 was repeated 15 minutes later. Axial length (AL) was measured using the Lenstar  
122 LS900 (Haag-Streit Koeniz, Switzerland) with five readings were taken and averaged.  
123 A non-contact tonometer (HNT-7000, Huvitz, Gunpo, South Korea) was used to  
124 measure the intraocular pressure with three repeated measurements. Additionally, a  
125 detailed interviewer-administered questionnaire answered by parents was used to  
126 collect the information of their children on the age of myopia onset, number of  
127 myopic parents, time near work and outdoors activities (hr/day) after school hours.  
128 Subjects were given a calendar to mark out the days when the trial medications were  
129 used and with more than 80% compliance rate were considered to include in the  
130 results analysis. Children were also provided photochromatic glasses (which darken

131 on exposure to ultraviolet or sunlight) if they experienced glare or if their parents  
132 were worried of excessive light exposure, or progressive glasses (reading add) if they  
133 experienced difficulty with near vision.

#### 134 **Sample size estimates:**

135 Sample size was calculated based on the results from the previous studies.<sup>18, 19, 23</sup> We  
136 assume that 0.01% atropine reduces the myopia progression rate by at least -0.36 D  
137 with standard deviation of 0.70 D, assuming a power of 90% with a 2-sided test of 5%.  
138 Thus, this study required 80 subjects in each group. Considering a drop-out rate of  
139 25%, a total of 220 participants would be adequate.

#### 140 **Randomization and Masking**

141 With the schedule generated by SAS program (SAS Institute, Cary, NC, USA), a  
142 statistician operated the randomization independently. Every eligible four children  
143 were randomly allocated into the intervention group or control group according to the  
144 priority order the children visited the hospital for treatment. The participants had an  
145 equal probability of assignment to either the two groups. The 0.01% atropine and  
146 placebo eye drops were packaged in identical bottles, and thus investigators and  
147 participants were not able to identify the contents. There were only the expiration date  
148 and study number on the bottle. The data analysts were also blinded to minimize  
149 observational bias.

#### 150 **Ethical consideration:**

151 Informed written consent was obtained from at least one parent, as well as verbal  
152 assent from each child. This clinical trial adhered to the tenets of the Declaration of  
153 Helsinki and was approved by the Institutional Review Board of Beijing Tongren



154 Hospital, Capital Medical University.

155 **Benefits of study:**

156 A high prevalence of 83.2% for myopia and 11.1% for high myopia was reported for  
157 central Chinese university students. Thus, the prevention and retardation of myopia  
158 progression will both statistically and clinically significant in children to reduce  
159 sight-threatening complications associated with myopia in later life.

160

161 **References**

- 162 1. Morgan IG, Ohno-Matsui K, Saw SM. Myopia. *Lancet*. 2012;379:1739-1748.
- 163 2. Pan CW, Ramamurthy D, Saw SM. Worldwide prevalence and risk factors for  
164 myopia. *Ophthalmic Physiol Opt*. 2012;32:3-16.
- 165 3. Holden BA, Fricke TR, Wilson DA, et al. Global Prevalence of Myopia and High  
166 Myopia and Temporal Trends from 2000 through 2050. *Ophthalmology*.  
167 2016;123:1036-1042.
- 168 4. Li SM, Liu LR, Li SY, et al. Design, methodology and baseline data of a  
169 school-based cohort study in Central China: the Anyang Childhood Eye Study.  
170 *Ophthalmic Epidemiol*. 2013;20:348-359.
- 171 5. Wei S, Sun Y, Li S, et al. Refractive Errors in University Students in Central  
172 China: The Anyang University Students Eye Study. *Invest Ophthalmol Vis Sci*.  
173 2018;59:4691-4700.
- 174 6. Saw SM, Gazzard G, Shih-Yen EC, Chua WH. Myopia and associated  
175 pathological complications. *Ophthalmic Physiol Opt*. 2005;25:381-391.
- 176 7. Wong TY, Ferreira A, Hughes R, et al. Epidemiology and disease burden of  
177 pathologic myopia and myopic choroidal neovascularization: an evidence-based  
178 systematic review. *Am J Ophthalmol*. 2014;157:9-25 e12.
- 179 8. Mitchell P, Hourihan F, Sandbach J, Wang JJ. The relationship between glaucoma  
180 and myopia: the Blue Mountains Eye Study. *Ophthalmology*. 1999;106:2010-2015.
- 181 9. Liang YB, Friedman DS, Wong TY, et al. Prevalence and causes of low vision

- 182 and blindness in a rural chinese adult population: the Handan Eye Study.  
183 Ophthalmology. 2008;115:1965-1972.
- 184 10. Smith TS, Frick KD, Holden BA, et al. Potential lost productivity resulting from  
185 the global burden of uncorrected refractive error. Bull World Health Organ.  
186 2009;87:431-437.
- 187 11. Lim MC, Gazzard G, Sim EL, et al. Direct costs of myopia in Singapore. Eye  
188 (Lond). 2009;23:1086-1089.
- 189 12. Schmid KL, Wildsoet CF. Inhibitory effects of apomorphine and atropine and  
190 their combination on myopia in chicks. Optom Vis Sci. 2004;81:137-147.
- 191 13. McBrien NA, Moghaddam HO, Reeder AP. Atropine reduces experimental  
192 myopia and eye enlargement via a nonaccommodative mechanism. Invest Ophthalmol  
193 Vis Sci. 1993;34:205-215.
- 194 14. Saw SM, Gazzard G, Au Eong KG, Tan DT. Myopia: attempts to arrest  
195 progression. Br J Ophthalmol. 2002;86:1306-1311.
- 196 15. Arumugam B, McBrien NA. Muscarinic antagonist control of myopia: evidence  
197 for M4 and M1 receptor-based pathways in the inhibition of experimentally-induced  
198 axial myopia in the tree shrew. Invest Ophthalmol Vis Sci. 2012;53:5827-5837.
- 199 16. Qu J, Zhou X, Xie R, et al. The presence of m1 to m5 receptors in human sclera:  
200 evidence of the sclera as a potential site of action for muscarinic receptor antagonists.  
201 Curr Eye Res. 2006;31:587-597.
- 202 17. Diether S, Schaeffel F, Lambrou GN, et al. Effects of intravitreally and  
203 intraperitoneally injected atropine on two types of experimental myopia in chicken.  
204 Exp Eye Res. 2007;84:266-274.
- 205 18. Li SM, Wu SS, Kang MT, et al. Atropine slows myopia progression more in  
206 Asian than white children by meta-analysis. Optom Vis Sci. 2014;91: 342-350.
- 207 19. Chua WH, Balakrishnan V, Chan YH, et al. Atropine for the treatment of  
208 childhood myopia. Ophthalmology. 2006;113:2285-2291.
- 209 20. Chia A, Chua WH, Cheung YB, et al. Atropine for the treatment of childhood  
210 myopia: safety and efficacy of 0.5%, 0.1%, and 0.01% doses (Atropine for the



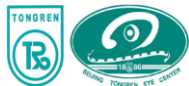

211 Treatment of Myopia 2). *Ophthalmology*. 2012;119:347-354.

212 21. Chia A, Lu QS, Tan D. Five-Year Clinical Trial on Atropine for the Treatment of  
213 Myopia 2: Myopia Control with Atropine 0.01% Eyedrops. *Ophthalmology*.  
214 2016;123:391-399.

215 22. Sacchi M, Serafino M, Villani E, et al. Efficacy of atropine 0.01% for the  
216 treatment of childhood myopia in European patients. *Acta Ophthalmol*.  
217 2019;97:e1136-e1140.

218 23. Larkin GL, Tahir A, Epley KD, Beauchamp CL, Tong JT, Clark RA: Atropine  
219 0.01% Eye Drops for Myopia Control in American Children: A Multiethnic Sample  
220 Across Three US Sites. *Ophthalmol Ther* 2019, 8:589-598.

221 24. Clark TY, Clark RA. Atropine 0.01% Eyedrops Significantly Reduce the  
222 Progression of Childhood Myopia. *J Ocul Pharmacol Ther*. 2015;31:541-545.

223

224

225

226

227

228

229

230

231

232

233

234

235

236

237

238

239

240

## Statistical Analysis Plan

### 241 **Data preparation**

242 All examination data were independently entered twice into a database using  
243 commercial software (Epidata software 3.1; The Epidata Association, Odense,  
244 Denmark) by two independent individuals. When there were discrepancies between  
245 the database entries, the raw data were checked. Statistical software (SAS version 9.4;  
246 SAS, Inc., Cary, NC, USA) was used for cleaning, logically checking, merging data,  
247 and analysis.

### 248 **Outcomes**

249 The spherical equivalent (SE) was calculated as the dioptric powers of the sphere and  
250 half of the cylinder (sphere +  $0.5 \times$  cylinder). The primary outcome was myopia  
251 progression and axial elongation defined as the mean change in cycloplegic SE and  
252 AL over 1 year. The secondary outcomes included adverse events during the  
253 treatment.

### 254 **Statistical analysis**

255 For all analyses, SPSS version 20.0 (SPSS, Chicago, Illinois, USA), was used. For  
256 continuous variables, the independent t-test and analysis of covariance were used to  
257 determine statistical significance between the atropine and control groups. The  
258 chi-square tests were used to compare the categorized data. We will first compare the  
259 demographics and baseline characteristics between 0.01% atropine and placebo  
260 groups, such as age, sex, initial SE (D), initial AL (mm), age at myopia onset, parental  
261 myopia, time outdoors and near work. We will examine the differences in the mean  
262 values of myopia progression and axial elongation between the atropine and control  
263 groups. In order to explore potential risk factors, including age at baseline, sex, initial  
264 spherical equivalent, intraocular pressure, age at myopia onset, parental myopia, time  
265 outdoors, and near work, associated with progressors in 0.01% atropine group, the  
266 multiple log-binomial regression analysis was performed using those factors as the  
267 dependent variable. Analyses were only performed on the right eye.



268

269

270

271

272

273

**0.01%阿托品滴眼液对中国学龄**

274

**儿童近视进展影响的随机双盲对**

275

**照试验**

276

277

278

**计划书**

279

280

281

282

283

284

285

286

287

288 **研究问题:**289 1. 与安慰剂组相比,0.01%阿托品滴眼液能否有效延缓中国近视儿童的近视进展  
290 和眼轴延长?291 2. 由于 0.01%阿托品滴眼液能够引起一定的不良反应,能否在中国近视儿童中  
292 使用?293 **研究背景**

294 近视已经成为影响儿童和成人眼健康的重要公共卫生问题,尤其在一些东亚  
295 和东南亚国家,例如中国和新加坡<sup>1,2</sup>。最近的研究预测,到 2050 年全球约有一  
296 半人口将患有近视,其中 10%是高度近视<sup>3</sup>。在中国,七年级学生的近视患病率  
297 达到近 70%,在大学生中甚至超过 80%<sup>4,5</sup>。近视不仅是可避免的视力残障和盲  
298 的最常见原因,且病理性近视会增加不可逆性致盲眼病的风险,包括近视性视网  
299 膜病变,视网膜脱离,脉络膜新生血管和青光眼<sup>6-9</sup>,这会给个人和社会带来沉  
300 重的成本负担<sup>10,11</sup>。

301 阿托品是一种非特异性毒蕈碱受体拮抗剂。到目前为止,尚不清楚阿托品延  
302 缓近视进展的确切机制。最初认为该受体通过抑制睫状肌的过度调节,但一些动  
303 物的睫状肌是由烟碱受体而非毒蕈碱受体介导,阿托品仍可有效预防动物的近视  
304 <sup>12-14</sup>。然而,阿托品可能作用于 M1 和 M4 毒蕈碱受体调节视网膜上的作用部位,  
305 从而毒蕈碱拮抗剂可控制近视<sup>15</sup>。此外,阿托品对巩膜软骨细胞糖胺聚糖合成的  
306 抑制作用也可能发挥延缓近视进展的作用<sup>16,17</sup>。目前,在临床实验中已证明阿托  
307 品有很好的减缓近视的进展的效果<sup>18-20</sup>。2006 年,阿托品治疗近视(ATOM 1)  
308 的研究发现,使用 1%阿托品 2 年后的平均近视进展仅为 $-0.28 \pm 0.92$  D,而安慰  
309 剂组为 $-1.20 \pm 0.69$  D<sup>19</sup>。然而,1%阿托品引起的眼部不适如近视模糊、畏光、过  
310 敏,限制了其使用。此外研究发现,停用 0.5%和 0.1%阿托品滴眼液后近视度数  
311 的反弹更大(ATOM 2 研究),而接受低浓度 0.01%阿托品滴眼液组的反弹效应  
312 较小<sup>21</sup>。因此,低浓度 0.01%阿托品滴眼液被越来越多地用于亚洲近视儿童的临  
313 床应用。

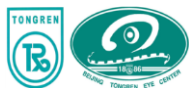

314 目前,大多数研究都是通过回顾性研究来评估低浓度 0.01%阿托品的疗效和  
315 安全性<sup>22-24</sup>,但很少有来自随机对照试验的数据,除了新加坡的一项研究(ATOM  
316 2)<sup>20</sup>。Chia 等人在新加坡进行的 ATOM 2 研究中,在 355 名儿童中,使用 0.5%,  
317 0.1%和 0.01%阿托品滴眼液组的 2 年平均近视进展分别为 $-0.30 \pm 0.60$  D,  $-0.38$   
318  $\pm 0.63$  D 和 $-0.49 \pm 0.63$ D<sup>20</sup>。但是,缺乏安慰剂对照组是该研究公认的不足。因  
319 此,目前尚未通过安慰剂对照试验广泛评估低浓度 0.01%阿托品滴眼液对中国儿  
320 童的效果。

321 因此,通过随机对照试验可以探索 0.01%阿托品滴眼液在中国学龄儿童延缓  
322 近视进展中的作用以及副作用,从而有助于回答上述问题。

### 323 研究目的

- 324 1. 分析 0.01%阿托品滴眼液对中国学龄儿童延缓近视进展和眼轴延长的  
325 效果;
- 326 2. 分析 0.01%阿托品滴眼液对中国学龄儿童的不良反应;
- 327 3. 分析停用 0.01%低浓度阿托品滴眼液后的反弹效应;
- 328 4. 探索低浓度阿托品在学龄儿童中使用的最佳年龄;

### 329 研究假设

330 0.01%阿托品滴眼液可以显著减慢近视儿童的近视进展和眼轴伸长。

### 331 研究计划

#### 332 设计

333 该研究是一项随机、双盲、安慰剂对照试验,旨在探索 0.01%阿托品滴眼液  
334 在中低度近视儿童中的效果和安全性,该研究于 2018 年 4 月至 2020 年 7 月进行。  
335 本研究将包括两个阶段:在第 1 阶段中,将招募的所有儿童按照 1:1 的比例随机  
336 分配到 0.01%阿托品滴眼液或安慰剂组,为期一年;第二年时,0.01%阿托品滴  
337 眼液组将在第二阶段转入安慰剂组,而安慰剂组将转入 0.01%阿托品滴眼液组,  
338 为期一年。

#### 339 纳入和排除标准

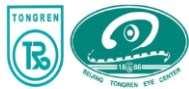

340 所有近视儿童将在 2018 年 4 月至 2018 年 7 月之间从北京同仁医院招募。所  
341 有受试者均符合以下入选标准：

- 342 (1). 6~12 岁学龄儿童，双眼等效球镜在-1.00 D 至-6.00 D 之间；  
343 (2). 双眼中任何一眼散光小于或等于 1.50 D；  
344 (3). 双眼的最佳矫正视力至少为 0.20 logMAR；  
345 (4). 双眼眼压小于 21 mm Hg；

346 排除标准：

- 347 (1). 患有其它眼部疾病（例如弱视，斜视，角膜疤痕，白内障，青光眼  
348 或眼部肿瘤等）的儿童；  
349 (2). 对阿托品和环戊酸酯或赋形剂过敏的孩子，及以前或目前使用阿托  
350 品，吡仑西平，角膜接触镜，双焦点眼镜或渐进镜的孩子。

## 351 研究流程

352 所有符合入选和排除标准的孩子都将被转交给临床研究协调员，他们将在招  
353 募患者之前获得家长和孩子的知情同意。入组者将在基线时以及实验开始后的 6  
354 个月和 12 个月时接受相同的标准化的检查。使用自动验光仪（HRK7000 A；韩  
355 国）连续 3 次测量睫状肌麻痹后屈光度，并使用平均值数据进行分析。球镜和柱  
356 镜的所有三个读数之间的最大差异为 0.25D。在每个受试者的检查过程中，睫状  
357 肌麻痹的方法为：每隔 5 分钟滴眼 3 次 1%的环戊通（Alcon），最后一次滴眼  
358 后 30 分钟，如果仍然存在瞳孔对光反射或瞳孔大小小于 6.0 mm，则应第四次滴  
359 入 1%环戊通，并在 15 分钟后重复检查。使用 Lenstar LS900（瑞士 Haag-Streit  
360 Koeniz）测量轴长长度（AL），五个读数并取平均值。使用非接触式眼压计  
361（HNT-7000，韩国）通过三次重复测量来测量眼内压。此外，还使用了由父母  
362 回答的详细的问卷调查表，以收集其子女的有关近视眼发病年龄，近视父母的数  
363 量，近距离工作时间和户外活动时间（小时/天）的信息。给予受试者日历以标  
364 明使用试验药物的日期，并认为结果分析中包含 80%以上的依从率。如果儿童  
365 感到眩光或父母担心过度暴露于光线下，还可以给他们提供变色眼镜（在暴露于  
366 紫外线或日光下会变黑），或者如果他们在视近上有困难，还可以配戴渐进眼镜。

## 367 样本量的估算

368 根据既往研究结果<sup>18, 19, 23</sup>，期望用药两年后两组之间的屈光度进展量差别在



369 0.36 D 以上有意义，标准差为 0.70 D，把握度为 90%，则样本量为： $N=2*$   
370  $(1.96+1.28)^2*(0.7)^2/(0.36)^2=80$ ，考虑到 25% 失访率，最终纳入 220 例受试者。

### 371 随机和双盲

372 根据 SAS 程序（美国北卡罗来纳州卡里市 SAS 研究所）生成的随机表，统  
373 计师独立进行随机操作。根据孩子们到医院就诊的顺序，将每 4 位合格的儿童随  
374 机分配到干预组或对照组。0.01% 阿托品滴眼液和安慰剂滴眼液包装在同样的瓶  
375 中，因此研究人员和参与者无法识别其中的内容物。瓶子上只有有效日期和研究  
376 编号。

### 377 伦理道德

378 至少要征得一位父母的知情同意，签写知情同意书，并要征得每个孩子的口  
379 头同意。该临床试验遵守循赫尔辛基宣言的宗旨，并得到首都医科大学附属北京  
380 同仁医院伦理委员会的批准。

### 381 研究意义

382 据报道，中国中部大学生的近视患病率已达 83.2%，高度近视患病率为  
383 11.1%。因此，在儿童青少年中延缓近视进展将具有重要意义，并减少与近视相  
384 关的眼底并发症。

385

### 386 参考文献

- 387 1. Morgan IG, Ohno-Matsui K, Saw SM. Myopia. Lancet. 2012;379:1739-1748.
- 388 2. Pan CW, Ramamurthy D, Saw SM. Worldwide prevalence and risk factors for  
389 myopia. Ophthalmic Physiol Opt. 2012;32:3-16.
- 390 3. Holden BA, Fricke TR, Wilson DA, et al. Global Prevalence of Myopia and High  
391 Myopia and Temporal Trends from 2000 through 2050. Ophthalmology.  
392 2016;123:1036-1042.
- 393 4. Li SM, Liu LR, Li SY, et al. Design, methodology and baseline data of a  
394 school-based cohort study in Central China: the Anyang Childhood Eye Study.  
395 Ophthalmic Epidemiol. 2013;20:348-359.
- 396 5. Wei S, Sun Y, Li S, et al. Refractive Errors in University Students in Central

- 397 China: The Anyang University Students Eye Study. *Invest Ophthalmol Vis Sci.*  
398 2018;59:4691-4700.
- 399 6. Saw SM, Gazzard G, Shih-Yen EC, Chua WH. Myopia and associated  
400 pathological complications. *Ophthalmic Physiol Opt.* 2005;25:381-391.
- 401 7. Wong TY, Ferreira A, Hughes R, et al. Epidemiology and disease burden of  
402 pathologic myopia and myopic choroidal neovascularization: an evidence-based  
403 systematic review. *Am J Ophthalmol.* 2014;157:9-25 e12.
- 404 8. Mitchell P, Hourihan F, Sandbach J, Wang JJ. The relationship between glaucoma  
405 and myopia: the Blue Mountains Eye Study. *Ophthalmology.* 1999;106:2010-2015.
- 406 9. Liang YB, Friedman DS, Wong TY, et al. Prevalence and causes of low vision  
407 and blindness in a rural chinese adult population: the Handan Eye Study.  
408 *Ophthalmology.* 2008;115:1965-1972.
- 409 10. Smith TS, Frick KD, Holden BA, et al. Potential lost productivity resulting from  
410 the global burden of uncorrected refractive error. *Bull World Health Organ.*  
411 2009;87:431-437.
- 412 11. Lim MC, Gazzard G, Sim EL, et al. Direct costs of myopia in Singapore. *Eye*  
413 (Lond). 2009;23:1086-1089.
- 414 12. Schmid KL, Wildsoet CF. Inhibitory effects of apomorphine and atropine and  
415 their combination on myopia in chicks. *Optom Vis Sci.* 2004;81:137-147.
- 416 13. McBrien NA, Moghaddam HO, Reeder AP. Atropine reduces experimental  
417 myopia and eye enlargement via a nonaccommodative mechanism. *Invest Ophthalmol*  
418 *Vis Sci.* 1993;34:205-215.
- 419 14. Saw SM, Gazzard G, Au Eong KG, Tan DT. Myopia: attempts to arrest  
420 progression. *Br J Ophthalmol.* 2002;86:1306-1311.
- 421 15. Arumugam B, McBrien NA. Muscarinic antagonist control of myopia: evidence  
422 for M4 and M1 receptor-based pathways in the inhibition of experimentally-induced  
423 axial myopia in the tree shrew. *Invest Ophthalmol Vis Sci.* 2012;53:5827-5837.
- 424 16. Qu J, Zhou X, Xie R, et al. The presence of m1 to m5 receptors in human sclera:  
425 evidence of the sclera as a potential site of action for muscarinic receptor antagonists.





426 Curr Eye Res. 2006;31:587-597.

427 17. Diether S, Schaeffel F, Lambrou GN, et al. Effects of intravitreally and  
428 intraperitoneally injected atropine on two types of experimental myopia in chicken.  
429 Exp Eye Res. 2007;84:266-274.

430 18. Li SM, Wu SS, Kang MT, et al. Atropine slows myopia progression more in  
431 Asian than white children by meta-analysis. Optom Vis Sci. 2014;91: 342-350.

432 19. Chua WH, Balakrishnan V, Chan YH, et al. Atropine for the treatment of  
433 childhood myopia. Ophthalmology. 2006;113:2285-2291.

434 20. Chia A, Chua WH, Cheung YB, et al. Atropine for the treatment of childhood  
435 myopia: safety and efficacy of 0.5%, 0.1%, and 0.01% doses (Atropine for the  
436 Treatment of Myopia 2). Ophthalmology. 2012;119:347-354.

437 21. Chia A, Lu QS, Tan D. Five-Year Clinical Trial on Atropine for the Treatment of  
438 Myopia 2: Myopia Control with Atropine 0.01% Eyedrops. Ophthalmology.  
439 2016;123:391-399.

440 22. Sacchi M, Serafino M, Villani E, et al. Efficacy of atropine 0.01% for the  
441 treatment of childhood myopia in European patients. Acta Ophthalmol.  
442 2019;97:e1136-e1140.

443 23. Larkin GL, Tahir A, Epley KD, Beauchamp CL, Tong JT, Clark RA: Atropine  
444 0.01% Eye Drops for Myopia Control in American Children: A Multiethnic Sample  
445 Across Three US Sites. Ophthalmol Ther 2019, 8:589-598.

446 24. Clark TY, Clark RA. Atropine 0.01% Eyedrops Significantly Reduce the  
447 Progression of Childhood Myopia. J Ocul Pharmacol Ther. 2015;31:541-545.

448

449

450

451

452

453

454

455

456

457

## 统计分析计划

### 458 数据准备

459 所有检查结果的数据均由两个独立的人使用软件（Epidata 软件 3.1）独立两  
460 次输入数据库。当数据库条目之间存在差异时，将检查原始数据。使用统计软件  
461 （SAS 版本 9.4； SAS 公司，美国北卡罗来纳州卡里）进行数据的清理，逻辑  
462 检查，合并数据和分析。

### 463 结果

464 等效球镜度（SE）计算方法为球体加上二分之一的柱镜（球镜度+ 0.5×柱  
465 镜度）。主要结果为近视进展和眼轴延长，定义为一年之间睫状肌麻痹后屈光度  
466 和眼轴长度的平均变化。次要结果包括实验期间的不良反应。

### 467 统计分析

468 对于所有分析，均使用 SPSS 20.0 版进行（SPSS，美国伊利诺伊州芝加哥）。  
469 对于连续变量使用独立样本 t 检验和协方差分析来确定 0.01%阿托品和对照组之  
470 间的统计学显著性。卡方检验用于比较分类数据。我们将首先比较 0.01%阿托品  
471 和安慰剂组的人口统计学和基线特征，例如年龄，性别，初始屈光度（D），初  
472 始眼轴长度（mm），近视发作年龄，父母近视，户外活动时间和近距离工作时间。  
473 我们将分析 0.01%阿托品组与对照组之间近视进展和眼轴延长平均值的差异。为  
474 了探讨潜在的与 0.01%阿托品组的近视进展者的危险因素，包括基线时的年龄，  
475 性别，初始屈光度，眼内压，近视发作的年龄，父母近视，户外活动的的时间和近  
476 距离工作时间等，采用了多重 log-binomial 回归分析。所有分析仅纳入右眼。
