# Supplementary material
Source: PubMed Central journal article supplement (PMC7530823)
Supplement: jamaophthalmol-e203820-s002.pdf [file jamaophthalmol-e203820-s002.pdf]

## Supplementary Online Content

Wei S, Li S-M, An W, et al. Safety and efficacy of low-dose atropine eyedrops for the treatment of myopia progression in Chinese children: a randomized clinical trial. *JAMA Ophthalmol*. Published online October 1, 2020. doi:10.1001/jamaophthalmol.2020.3820

**eTable 1.** Demographics and Baseline Characteristics of Those Completing the 1 Year Follow-up

**eTable 2.** Comparison of Demographics and Other Characteristics between Nonprogressors and Progressors in 0.01% Atropine Group

**eTable 3.** Log-binomial Regression Analysis of Risk Factors for Progressive Myopia in 0.01% Atropine Group

**eTable 4.** Log-binomial Regression Analysis of Risk Factors for Progressive Myopia in Placebo Group

This supplementary material has been provided by the authors to give readers additional information about their work.

eTable 1. Demographics and Baseline Characteristics of Those Completing the 1 year follow-up

| <b>Variables</b>                                                             | <b>Atropine group<br/>(n = 76)</b> | <b>Placebo group<br/>(n = 83)</b> |
|------------------------------------------------------------------------------|------------------------------------|-----------------------------------|
| Age, mean (SD), yrs                                                          | 9.69 (1.61)                        | 9.84 (1.56)                       |
| Male/female                                                                  | 38/38                              | 43/40                             |
| Initial SE, mean (SD), D                                                     |                                    |                                   |
| 6 to <7                                                                      | -2.37 (1.59)                       | -2.38 (0.53)                      |
| 7 to <8                                                                      | -2.00 (1.14)                       | -2.07 (0.96)                      |
| 8 to <9                                                                      | -1.93 (0.88)                       | -2.74 (1.18)                      |
| 9 to <10                                                                     | -2.54 (1.33)                       | -2.11 (1.21)                      |
| 10 to <11                                                                    | -2.46 (1.10)                       | -2.86 (1.41)                      |
| 11 to <12                                                                    | -3.15 (1.24)                       | -3.00 (1.63)                      |
| Mean (SD)                                                                    | -2.35 (1.15)                       | -2.63 (1.38)                      |
| Initial AL, mean (SD), mm                                                    |                                    |                                   |
| 6 to <7                                                                      | 24.77 (0.59)                       | 24.97 (0.17)                      |
| 7 to <8                                                                      | 23.87 (0.60)                       | 24.13 (1.07)                      |
| 8 to <9                                                                      | 24.21 (0.57)                       | 24.49 (0.80)                      |
| 9 to <10                                                                     | 24.41 (0.65)                       | 24.42 (0.90)                      |
| 10 to <11                                                                    | 24.73 (0.54)                       | 24.94 (0.86)                      |
| 11 to <12                                                                    | 25.17 (0.80)                       | 24.84 (1.16)                      |
| Mean (SD)                                                                    | 24.48 (0.71)                       | 24.64 (0.98)                      |
| IOP, mean (SD), mm Hg                                                        | 15.75 (2.78)                       | 15.64 (2.58)                      |
| Age at myopia onset, yrs                                                     | 7.92 (1.57)                        | 8.06 (1.69)                       |
| Parental myopia, n (%)                                                       |                                    |                                   |
| None                                                                         | 5 (6.6)                            | 7 (8.4)                           |
| One                                                                          | 30 (39.5)                          | 27 (32.5)                         |
| Both                                                                         | 41 (53.9)                          | 49 (59.0)                         |
| Time outdoors,<br>mean (SD), h/d                                             | 1.28 (0.59)                        | 1.43 (0.80)                       |
| Near work, mean (SD), h/d                                                    | 3.13 (1.34)                        | 3.17 (1.63)                       |
| SE= spherical equivalent,<br>AL= axial length,<br>IOP= intraocular pressure. |                                    |                                   |

eTable 2. Comparison of Demographics and Other Characteristics between Nonprogressors and Progressors in 0.01% Atropine Group

| <b>Variables</b>                | <b>Nonprogressors<br/>(n = 37)</b> | <b>Progressors<br/>(n = 39)</b> | <b>P-value</b> |
|---------------------------------|------------------------------------|---------------------------------|----------------|
| Age at baseline, mean (SD), yrs | 10.20 (1.52)                       | 9.20 (1.57)                     | 0.006          |
| Male/female                     | 15/22                              | 23/16                           | 0.108          |
| Initial SE, mean (SD), D        | -3.04 (1.28)                       | -2.09 (1.12)                    | 0.001          |
| Initial AL, mean (SD), mm       | 24.69 (0.77)                       | 24.47 (0.83)                    | 0.251          |
| IOP, mean (SD), mm Hg           | 15.87 (2.73)                       | 15.64 (2.86)                    | 0.722          |
| Age at myopia onset, yrs        | 8.03 (1.56)                        | 7.82 (1.59)                     | 0.572          |
| Parental myopia, n (%)          |                                    |                                 | 0.190          |
| None                            | 3 (8.1%)                           | 2 (5.1%)                        |                |
| One                             | 18 (48.6%)                         | 12 (30.8%)                      |                |
| Both                            | 16 (43.2%)                         | 25 (64.1%)                      |                |
| Time outdoors, mean (SD), h/d   | 1.30 (0.60)                        | 1.27 (0.59)                     | 0.793          |
| Near work, mean (SD), h/d       | 3.29 (1.30)                        | 2.98 (1.38)                     | 0.324          |

SE= spherical equivalent, AL= axial length, IOP= intraocular pressure. CI, confidence interval.

eTable 3. Log-binomial Regression Analysis of Risk Factors for Progressive Myopia in 0.01% Atropine Group

| Variable                                                                          | Unadjusted Analysis    |         | Adjusted Analysis      |         |
|-----------------------------------------------------------------------------------|------------------------|---------|------------------------|---------|
|                                                                                   | Relative Risk (95% CI) | P-value | Relative Risk (95% CI) | P-value |
| Age at baseline (yrs)                                                             | 0.844 (0.784, 0.960)   | < .001  | 0.908 (0.715, 1.143)   | .391    |
| Sex                                                                               | 0.721 (0.445, 1.122)   | .156    | 0.822 (0.552, 1.174)   | .225    |
| Initial SE (D)                                                                    | 1.414 (1.138, 1.747)   | .002    | 1.324 (1.048, 1.620)   | .004    |
| IOP (mm Hg)                                                                       | 0.986 (0.910, 1.067)   | .739    | 0.986 (0.928, 1.049)   | .637    |
| Age at myopia onset                                                               | 0.967 (0.874, 1.116)   | .600    | 0.997 (0.794, 1.281)   | .980    |
| Parental myopia (n)                                                               | 1.361 (0.929, 2.138)   | .140    | 0.980 (0.725, 1.510)   | .902    |
| Time outdoors (h/d)                                                               | 0.955 (0.651, 1.361)   | .814    | 0.768 (0.565, 1.069)   | .064    |
| Near work (h/d)                                                                   | 0.925 (0.798, 1.094)   | .348    | 0.949 (0.787, 1.128)   | .575    |
| SE= spherical equivalent, AL= axial length, IOP= intraocular pressure,            |                        |         |                        |         |
| CI, confidence interval; Bold values indicate statistical significance (P <0.05). |                        |         |                        |         |

eTable 4. Log-binomial Regression Analysis of Risk Factors for Progressive Myopia in Placebo Group

| Variable                                                                          | Unadjusted Analysis    |         | Adjusted Analysis      |         |
|-----------------------------------------------------------------------------------|------------------------|---------|------------------------|---------|
|                                                                                   | Relative Risk (95% CI) | P-value | Relative Risk (95% CI) | P-value |
| Age at baseline (yrs)                                                             | 0.933 (0.878, 1.008)   | .041    | 0.868 (0.718, 1.062)   | .181    |
| Sex                                                                               | 1.069 (0.789, 1.455)   | .657    | 1.047 (0.783, 1.420)   | .746    |
| Initial SE (D)                                                                    | 1.110 (0.995, 1.257)   | .082    | 1.044 (0.899, 1.221)   | .538    |
| IOP (mm Hg)                                                                       | 1.002 (0.938, 1.070)   | .959    | 1.000 (0.934, 1.059)   | .989    |
| Age at myopia onset                                                               | 0.996 (0.917, 1.102)   | .938    | 1.109 (0.895, 1.337)   | .360    |
| Parental myopia (n)                                                               | 1.017 (0.824, 1.317)   | .885    | 0.930 (0.776, 1.241)   | .538    |
| Time outdoors (h/d)                                                               | 0.977 (0.821, 1.160)   | .799    | 0.913 (0.734, 1.119)   | .387    |
| Near work (h/d)                                                                   | 1.012 (0.930, 1.089)   | .767    | 1.018 (0.900, 1.126)   | .754    |
| SE= spherical equivalent, AL= axial length, IOP= intraocular pressure,            |                        |         |                        |         |
| CI, confidence interval; Bold values indicate statistical significance (P <0.05). |                        |         |                        |         |
