# Supplementary material
Source: PubMed Central journal article supplement (PMC7530823)
Supplement: jamaophthalmol-e203820-s003.pdf [file jamaophthalmol-e203820-s003.pdf]

## **Data Sharing Statement**

### **Data**

**Data available:** No

### **Additional Information**

**Explanation for why data not available:** We will be unable to share the data at this stage with others. Two phases were included in this study. This is the result of the first phase of study.
